# Supplementary material for: Aloperine Protects Mice against DSS-Induced Colitis by PP2A-Mediated PI3K/Akt/mTOR Signaling Suppression
Source: PubMed Central journal article supplement (PMC5625759; doi:10.1155/2017/5706152), 2017-09-19

**Supplementary Figure 1. Schematic illustration of the C57BL/6 mice randomly divided into five groups. i.g.: intragastric administration; DSS: Dextran sodium sulfate.**

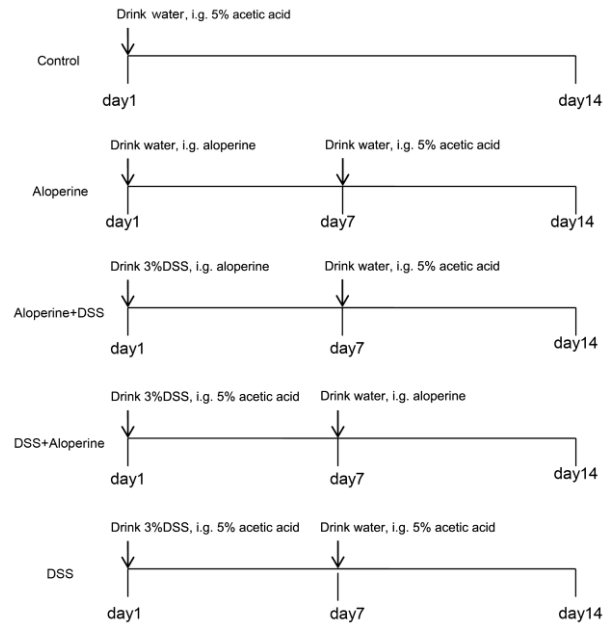

**Supplementary Figure 2. Effects of aloperine on PI3K/Akt/mTOR signaling and**

**PP2Ab in Jurkat cells. (A)** Western blot analysis of PI3K/Akt/mTOR signaling in

Jurkat cells after 24 h treatment with different concentrations (0.25, 0.5, or 1 mM). **(B)**

Western blot analysis of PHLPP1, PML, and PP2Ab after 24 h treatment with

different concentrations (0.25, 0.5, or 1 mM). **(C)** Immunofluorescent staining of

PP2Ab in Jurkat cells after treatment with 0.5 mM aloperine for 48 h.

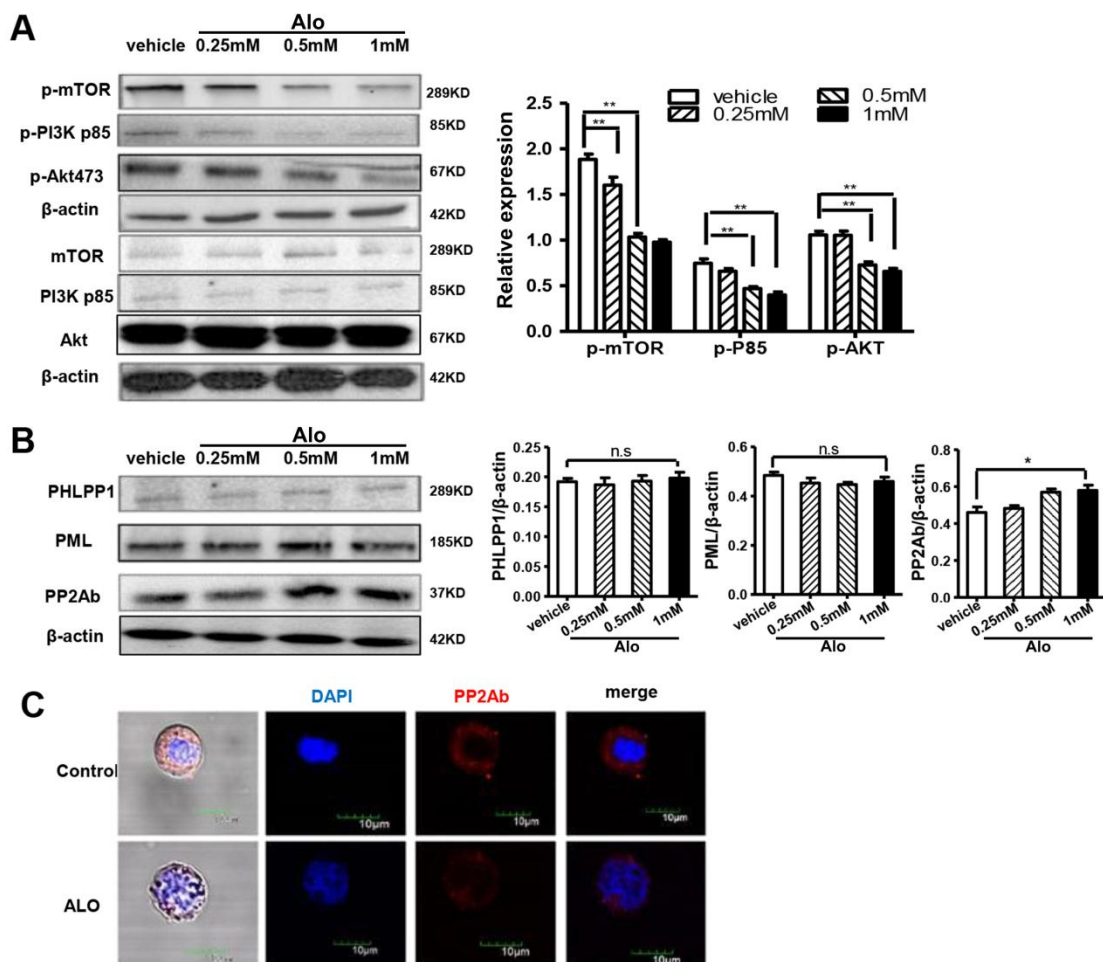

Supplement: 5706152.f1.pdf [file 5706152.f1.pdf]
